# Supplementary material for: Synergistic effect of a “stellate” mesoporous SiO2@Au nanoprobe and coffee-ring-free hydrophilic–hydrophobic substrate assembly in an ultrasensitive SERS-based immunoassay for a tumor marker
Source: Royal Society of Chemistry journal article supplement (doi:10.1039/c9tc05646g), 2019-12-10
Supplement: c9tc05646g1.pdf [file c9tc05646g1.pdf]

**Synergistic effect of “stellate” mesoporous SiO<sub>2</sub>@Au nanoprobe and coffee-ring-free hydrophilic-hydrophobic assembly substrate in ultrasensitive SERS-based immunoassay of tumor marker**

Zhiyuan Yang<sup>a</sup>, Hongmei Liu<sup>b</sup>, Yiran Tian<sup>a</sup>, Ying Chen<sup>a</sup>, Zhiqiang Niu<sup>a</sup>, Canliang Zhou<sup>a</sup>, Chenjie Gu<sup>a</sup>, Shiwei Tang<sup>a,\*</sup>, Tao Jiang<sup>a,\*</sup>, Jun Zhou<sup>a</sup>

*<sup>a</sup>Department of Microelectronic Science and Engineering, School of Physical Science and Technology, Ningbo University, Ningbo 315211, Zhejiang, P. R. China*

*<sup>b</sup>Institute of Solid State Physics, Shanxi Datong University, Datong 037009, Shanxi, P. R. China*

\*Corresponding author: Tao Jiang, E-mail: jiangtao@nbu.edu.cn; Shiwei Tang, E-mail: tangshiwei@nbu.edu.cn, 818 Fenghua Road, Ningbo 315211 China

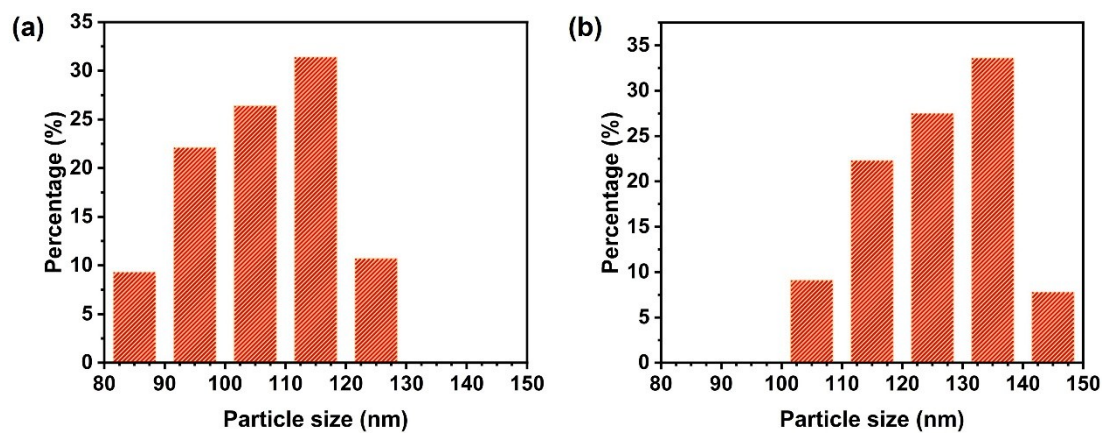

Fig. S1 Size-distribution histograms of (a) SMSiO<sub>2</sub> and (b) SMSiO<sub>2</sub>@Au NPs.

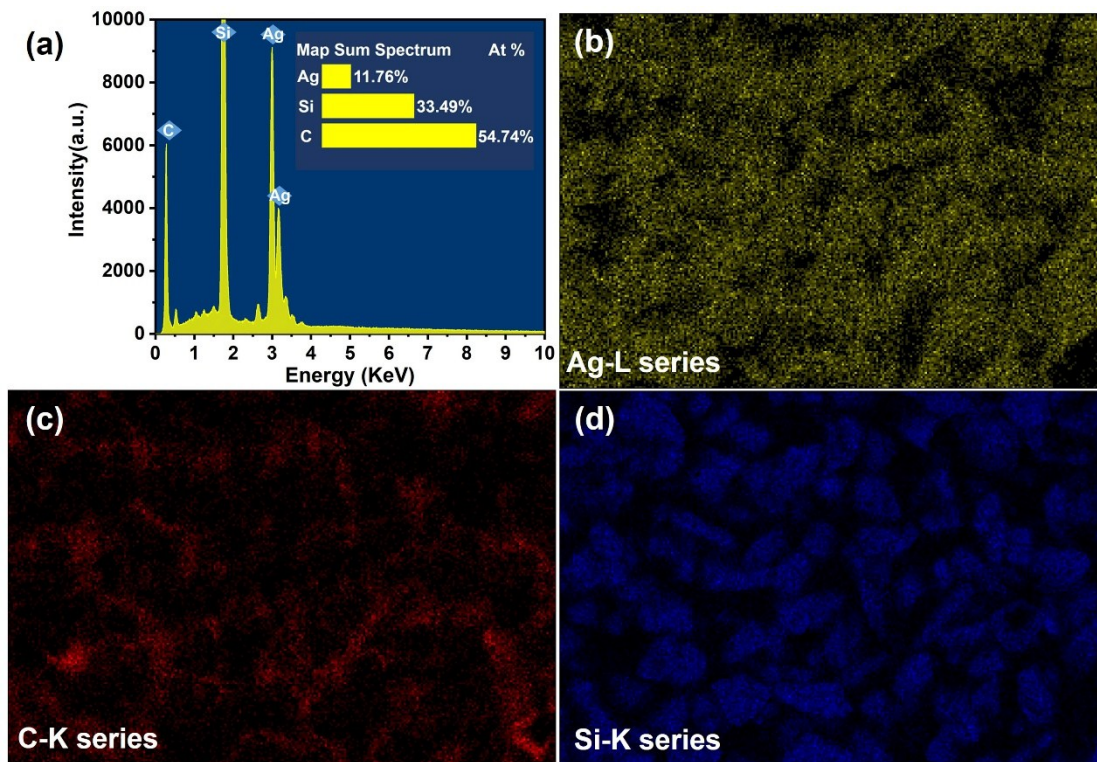

Fig. S2 (a) EDS of Ag-coated sandpaper and the corresponding local elemental mapping of (b) Ag, (c) C, and (d) Si.

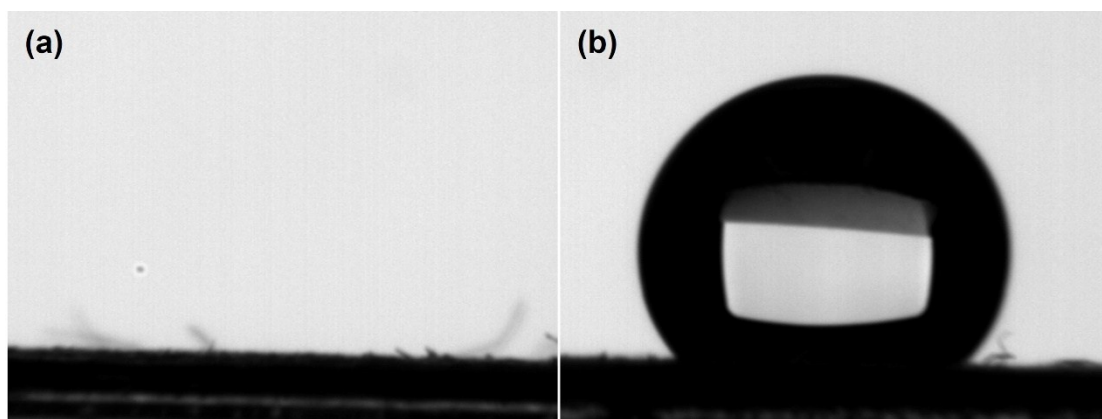

Fig. S3 Water CAs of filter paper (a) before and (b) after hydrophobic treatment.

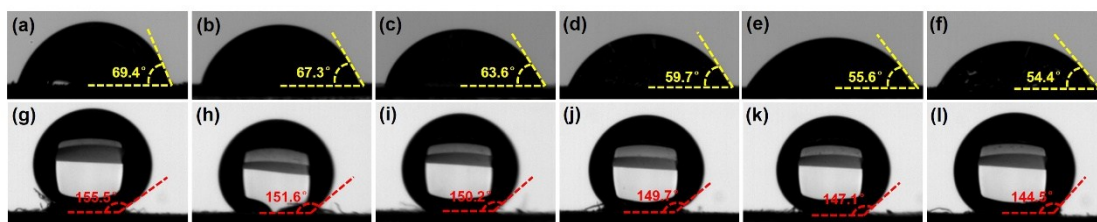

Fig. S4 Water CAs of the hydrophilic-hydrophobic SERS-active structure using Ag-coated sandpapers with different grit sizes of (a, g) 120, (b, h) 220, (c, i) 800, (d, j) 1500, (e, k) 3000, and (f, l) 7000 mesh before (up) and after (down) assembly.

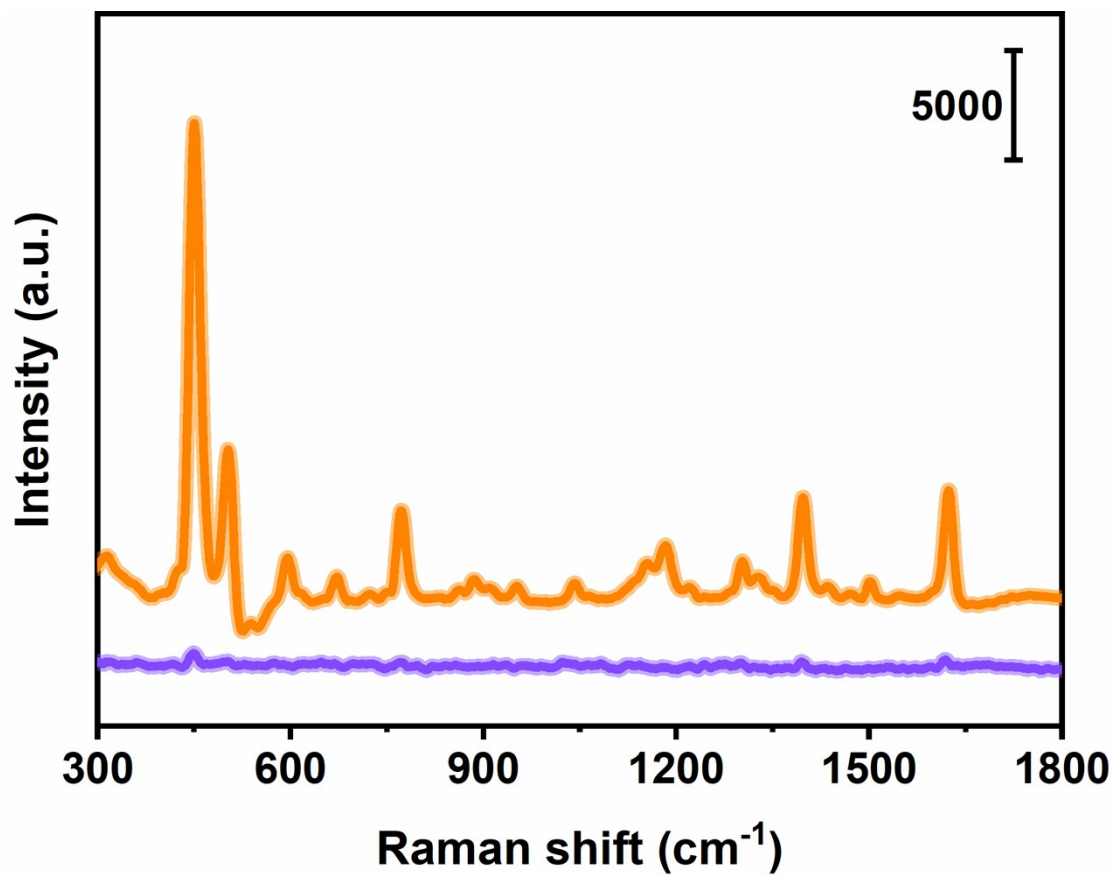

Fig. S5 SERS spectrum of MB on the SERS-active substrate and Raman spectrum of MB powder.

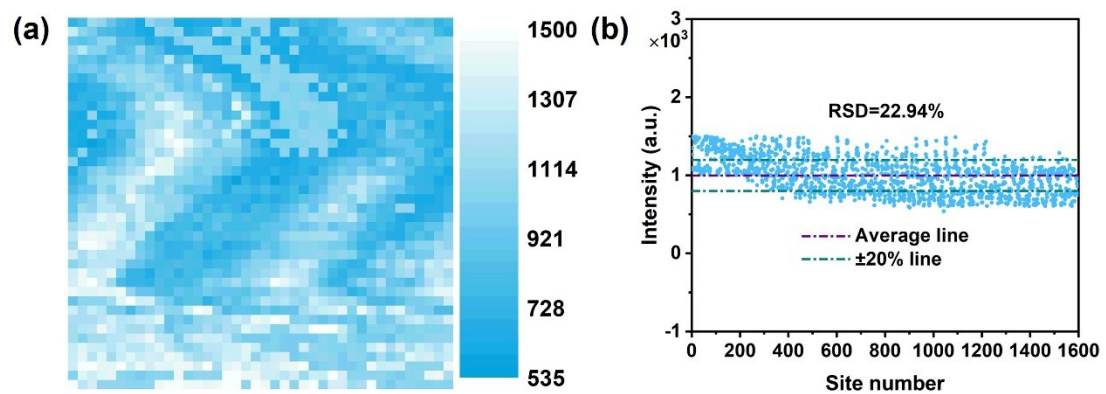

Fig. S6 (a) SERS mappings and (b) the corresponding intensity distribution of the peak at  $451\text{ cm}^{-1}$  recorded from the substrates before assembly modified by MB.

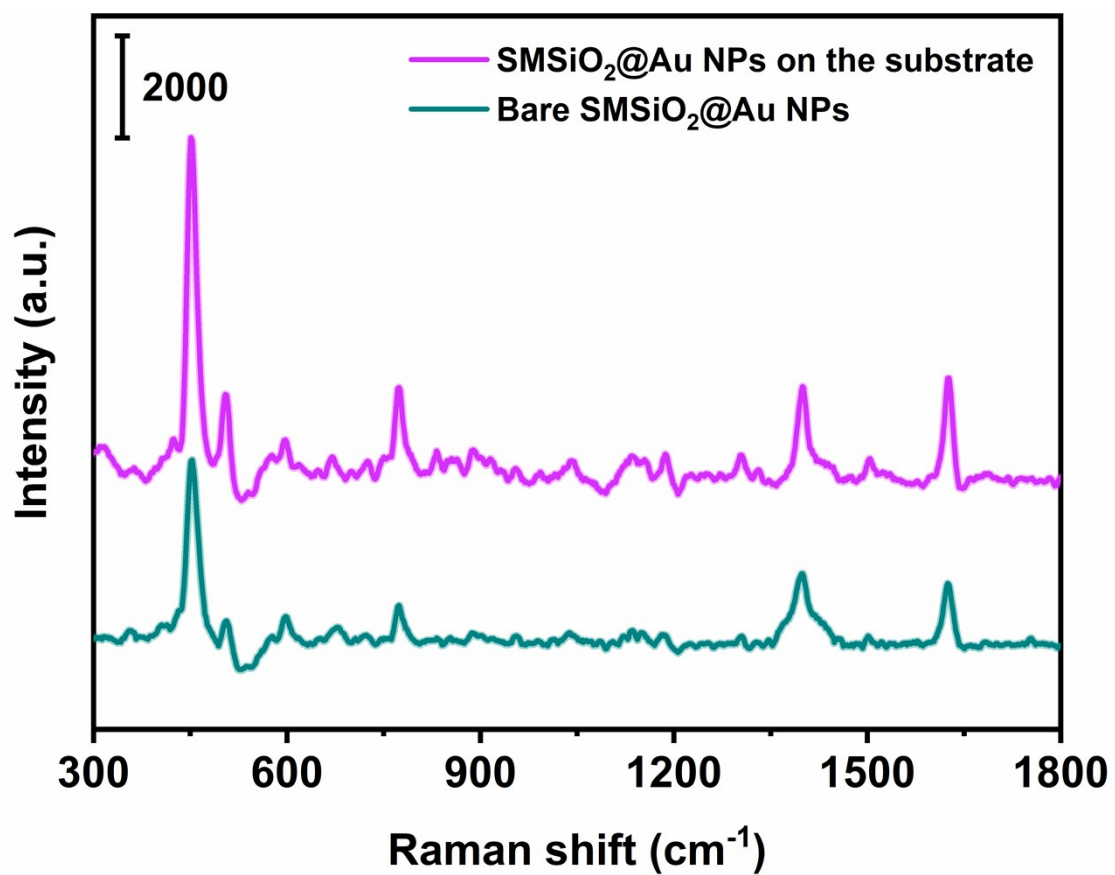

Fig. S7 SERS spectra of SMSiO<sub>2</sub>@Au NPs modified with MB molecules (0.5 mM) dropped onto the hydrophilic-hydrophobic substrate without immunoreaction and bare SMSiO<sub>2</sub>@Au NPs.
